# Supplementary material for: Synthesis and functionalisation of spherical meso-, hybrid meso/macro- and macro-porous cellular silica foam materials with regulated pore sizes for CO2 capture
Source: Royal Society of Chemistry journal article supplement (doi:10.1039/c8ta06224b), 2018-01-01
Supplement: c8ta06224b1.pdf [file c8ta06224b1.pdf]

## Supporting Information

### Synthesis and functionalisation of spherical meso-, hybrid meso/macro- and macro-porous cellular silica foam materials with regulated pore sizes for CO<sub>2</sub> capture

Yuan Sun,<sup>a</sup> Xin Liu,<sup>a</sup> Chenggong Sun\*,<sup>a</sup> Waleed Al-Sarraf, Khai Zhen Foo,<sup>a</sup> Yang Meng,<sup>a</sup> Stevens Lee,<sup>a</sup> Wenlong Wang<sup>b</sup> and Hao Liu<sup>a</sup>

<sup>a</sup> Faculty of Engineering, University of Nottingham, University Park, Nottingham NG7 2RD, UK

<sup>b</sup> School of Energy and Power Engineering, Shandong University, Jinan, Shandong 250061, P. R. China

\* Email: [cheng-gong.sun@nottingham.ac.uk](mailto:cheng-gong.sun@nottingham.ac.uk)

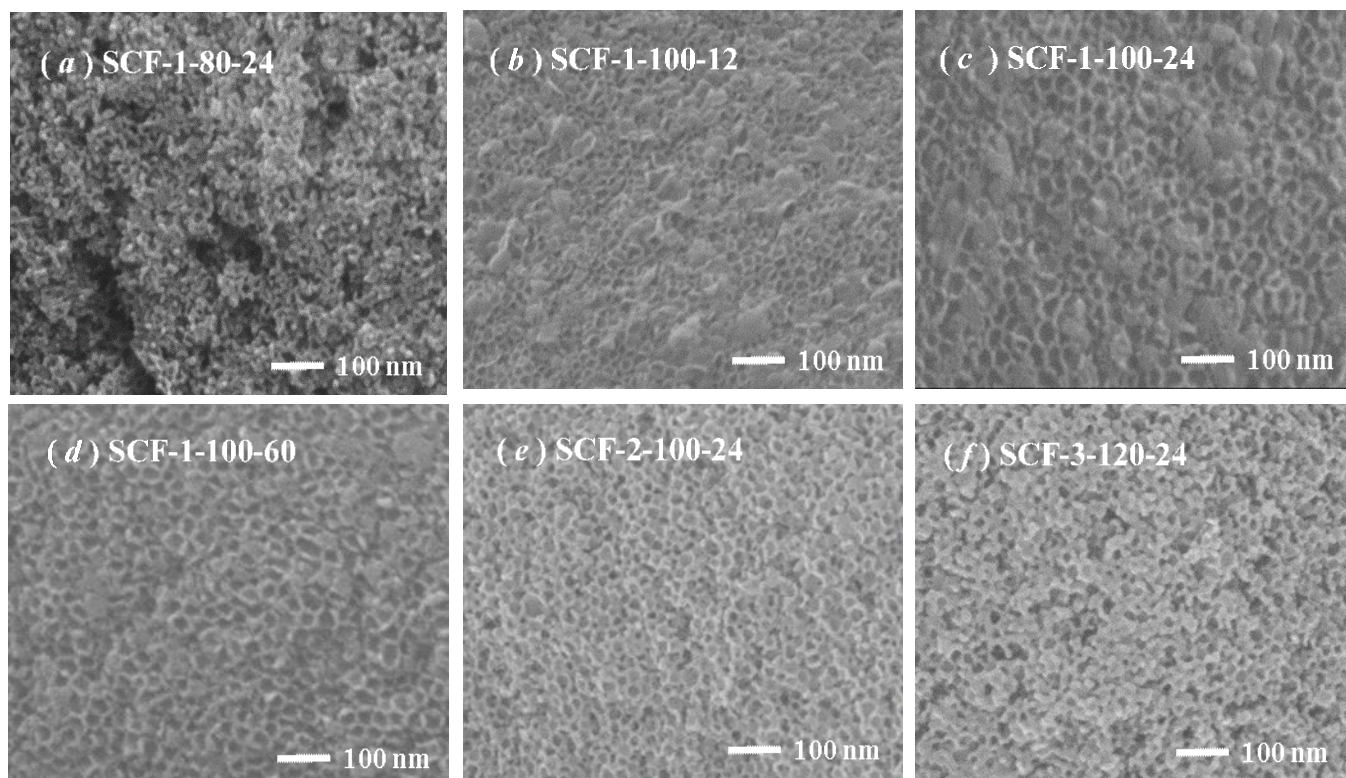

Fig. S1 FEG-SEM images of representative SCF particles synthesized under different preparation conditions, showing the transition from the loosely packed texture of the cellular silica foams prepared at lower temperature and TMB/P123 mass ratios, to more densely packed and ordered structures of the cellular foams prepared at higher aging temperatures and TMB/P123 ratios.

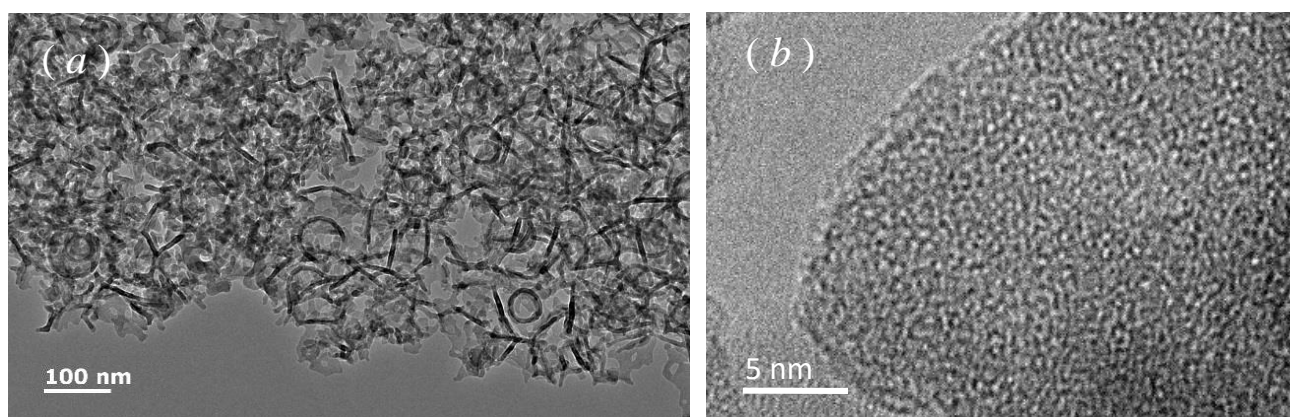

Fig. S2 FEG-TEM images of a representative siliceous cellular foam material prepared at 120 °C and a TMB/P123 mass ratio of 3 with an aging time of 24 hours (SCF-3-120-24), showing the macro-porous foamed structures with dense silica struts or walls composed of highly interconnected and open-celled nano-foams.
